# Health financing in Sudan: key informant interviews in the wake of the 2023 conflict

Dr Fatima Bashir, MPH, MPP

Oxford Blavatnik School of Government, Oxford, UK

[fatima.bashir@bsg.ox.ac.uk](mailto:fatima.bashir@bsg.ox.ac.uk)

Dr Luke N Allen (corresponding author), MBChB, MPH, PGDip Health research, MRCP, FHEA

London School of Hygiene & Tropical Medicine, London, UK

[luke.allen@lshtm.ac.uk](mailto:luke.allen@lshtm.ac.uk)

**NOTE: This preprint reports new research that has not been certified by peer review and should not be used to guide clinical practice.**

# Abstract

## Background

Sudan is a large, landlocked, African country with a population of 46 million. It is considered a ‘least developed’ country, and coverage of essential health services is low. In April 2023 fighting broke out between the Sudanese Armed Forces and the paramilitary Rapid Support Forces. The conflict quickly escalated and has claimed 9,000 lives so far, with hundreds of thousands of people internally displaced. It is unclear exactly how the war has impacted Sudan’s already fragile health financing system.

## Methods

We conducted one-to-one semi-structured interviews with a purposive sample of experienced health financing policymakers and policy advisors working in- or with the Sudanese government. Five senior key informants were recruited using snowball sampling. Interview transcripts were analysed using thematic analysis, with reference to the WHO national health financing framework and Sparkes and colleagues’ political economy framework.

## Findings

Conflict has undoubtedly undermined Sudan’s ability to mobilise, allocate, and distribute financial resources. However, the existing health infrastructure was already so weak, and state funds so meagre, that the challenges posed by fighting were overshadowed by themes around Sudan’s underlying structural issues: out of pocket payments account for over 70% of all health expenditure; the existing national insurance scheme only covers a minority of the population; and there is unclear delineation of responsibilities between purchasers and providers and between the federal and state ministries of health. Major themes emerged around governance, revenue raising, risk pooling, purchasing and service delivery, and external donor funding.

## Conclusions

Investment in developing health financing capacity at the state level, implementation planning, blended financing for the national health insurance fund, donor coordination, and community mobilisation to agitate for greater risk pooling were identified as essential steps. Without robust mechanisms to pool risk and diversification of financing sources, it will not be possible to extend financial risk protection or basic health services to large sections of Sudan’s population.

## 42 Introduction

43 Fighting broke out across Sudan in April 2023, severely impacting an already fragile health system that serves one of  
44 the worlds' least developed countries. Even before the war, Sudan's life expectancy at birth was only 65.3 years (1)  
45 and its under 5 mortality rate was double the global average (54.9 deaths per 1,000 live births).(2) The estimated  
46 number of people who need humanitarian assistance reached 24.7 million in May 2023, representing almost half of  
47 Sudan's total population. WHO estimate that 11 million of these people require emergency assistance for life-  
48 threatening conditions or life-sustaining support to meet minimum living standards (3). These figures will continue to  
49 rise as the ongoing conflict progresses.

50 Anecdotal reports suggest that Sudan's health financing system has been crippled by the conflict, severely impeding  
51 service delivery at a time when it is needed most. However, it is not clear which parts of the system are under greatest  
52 stress, or what actions should be prioritised to safeguard financing of essential health services. There is an urgent need  
53 for information around exactly how the conflict has affected Sudan's health financing situation and what actions should  
54 be taken in the short and longer term to alleviate critical pressures - and build a fairer and more sustainable system  
55 for the future.

56 In this paper we aimed to evaluate Sudan's current health financing situation, exploring the perceptions of health  
57 finance experts on how the conflict has impacted the current model, and identify priority actions to secure health  
58 financing for essential health services. We present an extended background review of the context and current financing  
59 landscape before presenting methods for key stakeholder interviews, findings, and recommendations.

### 60 Geopolitical context

61 Sudan is the third largest country in the African continent and has an estimated population of over 46 million. According  
62 to UNCTAD it is considered a 'least-developed' country (4) and continues to be afflicted by protracted conflict, regional  
63 inequities, and is considered a fragile state struggling to perform basic essential functions to meet the basic needs of  
64 its population. The economic situation in Sudan had seen a slow but gradual increase in GDP by an average of 6% per  
65 year from 1999-2010, until the succession of South Sudan in 2011. The World Bank Human Capital Index ranks Sudan  
66 139 out of 157 countries. Approximately two thirds of Sudanese are living below the national poverty line, with the  
67 highest poverty rates observed in conflict-afflicted states (5). A third of the population do not have access to safe  
68 drinking water sources (UNICEF Sudan Water, Sanitation and Hygiene Annual Report, 2020) (5, 6). Just over 60% of the  
69 population are literate, and the average citizen has 3.8 years of schooling. Life expectancy is 65.3 years and the leading  
70 causes of death are pneumonia (7.4%); followed by malaria (6.8%); and then malignant neoplasms (4.6%) (5).

71 Sudan has long experienced political instability. The most recent coup occurred on October 25, 2021, when the  
72 Sudanese armed forces (SAF) and the paramilitary Rapid Support Forces (RSF) deposed the transitional government  
73 (7). Strain between the RSF and SAF had been growing alongside political negotiations on the merging of both forces.  
74 Tensions escalated into a full-scale armed conflict on April 15, 2023, when both warring factions exchanged intense  
75 fire north of Khartoum which quickly spread across the country (8).

76 Sudan's poor relations with the international community has made it ineligible for debt relief. Access to grants and  
77 funding from global and regional financial institutions for development initiatives has also significantly impacted the  
78 population's health (MICS, 2014) (6). There was considerable effort being made on this front under the leadership of  
79 the transitional governments' Prime Minister Hamdok, however these efforts came to an abrupt end with the October  
80 2021 coup (9).

### 81 **Sudan's health system**

82 In theory, the health system in Sudan is decentralized and mirrors the overall political system with three levels of  
83 governance: federal, state, and locality. However there is an absence of a clear demarcation of the roles and  
84 responsibilities of each tier (10, 11). The Federal Ministry of Health (FMOH) is home to ten general directorates, and is  
85 mandated with health sector financing, policy-making, strategic planning, technical support, and international/global  
86 relations, (10). Eighteen state ministries of health (SMOH) are responsible for the implementation of policies and  
87 service delivery at district level.

88 Policy is usually formulated by the FMOH However, the WHO Joint Annual Review of 2017 noted that some states do  
89 not use these national policies and guidelines - particularly for primary care units. This review also highlighted the  
90 inequality of access and uptake of services among and within the states. Sudan's universal health coverage (UHC)  
91 service coverage index was reported at just 44.3% in 2017 (5). While government reports emphasize high accessibility  
92 to primary care facilities (specifically within 5 km reach), most facilities are unable to provide all essential health  
93 services (11, 12). The health system is considerably hospital-centric, with much fragmentation and inefficiency due to  
94 the proliferation of providers and stakeholders in the absence of coordination or clear planning.(5)

95  
96 Sudan's human resources for health (HRH) is facing several challenges. There is considerable disparity in the  
97 distribution of HRH between public and private sectors and between urban and rural areas (5) Additionally, 'brain-  
98 drain' (the migration of trained medical professionals outside Sudan) and high turnover of staff remain constant threats  
99 to the capacity of the FMOH. According to the World Bank's latest estimate, there are 1.1 nurses and midwives per  
100 1000 population, and 0.3 physicians per 1000 population (1), in comparison to the WHO recommendations of 4.45  
101 physicians, nurses, and midwives per 1000 population, these figures are inadequate for achieving UHC (13). Moreover,  
102 70% of the health workforce currently work in urban settings despite 70% of the population residing in urban areas  
103 (14).

### 104 **Overview of health financing landscape**

105  
106 The health sector suffers from limited financial resources. The main financing sources are the Ministries of Health, the  
107 National Health Insurance Fund (NHIF), the Armed Forces Health Insurance Schemes, out of pocket (OOP) spending,  
108 and international aid/donors' funds. Health Expenditure was reported at USD 2.4 billion in 2018 (USD 58.84/capita);  
109 down from USD 4.8 billion (USD 132.3 per capita) in 2015.

110 Health facilities at different levels receive funds from different sources, each with different and distinct incentive  
111 structures. External aid funds are managed by the FMOH and are used to finance vertical programs such as HIV, TB,  
112 and malaria. Staff salaries are managed by the SMOH, while curative care is funded by the NHIF, the Ministries of  
113 Health, and the Ministry of Welfare and Social Security (12). Delivery of health care services is relegated to the 18  
114 states, while facing formidable challenges in mobilizing adequate financing for their functioning. A significant share of  
115 the federal consolidated health budget is transferred through federal block grants with lack of clarity of laws that  
116 delegate responsibility and financing functions to states and localities (12).

117 Public expenditure on the health sector has remained at between 7-8% as a share of total public spending during the  
118 last decade, representing about 1.5% of GDP (11). Despite the Government commitment to providing free emergency  
119 medical care, free medicines for children under 5, and free medical care for specific diseases, a considerable amount  
120 of OOP expenditure is still incurred: 74% of total expenditure on health in 2018, reflecting a small decrease since 2015  
121 (83.3%), but still far above 2008 levels (63%).(5) While OOP represents the main component of health expenditure,  
122 the role of donor funds is catalytic in certain areas, particularly those related to strengthening the health system.(15)  
123 Development partners including GAVI and the Global Fund for AIDs, TB, and Malaria (GF) support multiple health  
124 systems ‘building blocks’, including HRH capacity building, procurement, and supply chain management system, and  
125 health information systems in Sudan (15). The National Health Sector Partners’ Forum is the main coordination  
126 mechanism for all the health and development sector partners.

127  
128 Figure 1 shows that overall health spending was rose between 2002 and 2008, mainly driven by an increase in  
129 government, pre-paid, and DAH spending. Government spending fell after 2010 but overall health expenditure  
130 remained at around USD 2 billion, with the shortfall covered by an expansion in OOP and a small absolute increase in  
131 DAH.

132  
133 [Figure 1 here]

134 ***Figure 1: Trends in total health expenditure***

135 ***Source: Institute for Health Metrics and Evaluation vizhub***

136  
137 Major financial protection schemes include the NHIF which covers approximately 43.8% of the population (nhif.gov.sd,  
138 2016), and premiums for households living below the national poverty line are covered by public funds (12). While  
139 there are admirable attempts to expand coverage, the health financing landscape is impeded by fragmentation of  
140 funding pools, especially those of the FMOH and NHIF and the overall lack of coordination and management capacity  
141 (12). There are other religious-based social security taxes, such as the Zakat Fund, which provide further support and  
142 subsidize the health care costs of lower income groups, however these only cover small minorities of the total

143 population.(12) In terms of the main health financing challenges facing Sudan before the current conflict, the  
144 overreliance on OOP created inequities in terms of access to treatment and care for vulnerable populations.

### 145 **The October 2021 Coup**

146 On October 25, 2021, the Sudanese General Commander Abdel Fattah al-Burhan announced the dissolution of the  
147 transitional government and Sovereignty Council, declared a state of emergency, and placed Prime Minister Abdalla  
148 Hamdok and most of his cabinet under arrest (16). While the military power termed this endeavour as a ‘correction of  
149 the political pathway’ it was in effect a coup d’etat and was recognized as such by most of the international community.

150 The coup affected the health system in many ways; Alhadi et al summarised these impacts in the following: creation  
151 of a leadership void: both Federal Minister and undersecretary were dismissed in the immediate aftermath of the coup  
152 effectively terminating leadership and lines of command which led to a severely felt disorientation in terms of  
153 management and coordination; interruption in donor funding: on a background of difficult major financial reforms that  
154 were taking place in the country prior to the coup, post-coup events further exacerbated the financial situation with  
155 major donor funding being frozen in a direct response to the military takeover. The USA alone suspended over USD  
156 700 million of its direct assistance to Sudan’s government (7, 17). The suspension of Sudan from the African Union (18)  
157 created further challenges around the country’s ability to access external aid through regional development funds  
158 (access is often contingent on AU membership). This suspension also led to the terminating of funding from the World  
159 Bank. This withdrawal of funds severely impacted the health sector - particularly in the capital Khartoum where 70%  
160 of health services are delivered. Furthermore, medical professionals have been a political target for security forces as  
161 they are considered significant challengers for military rule (7). There is a lack of clarity on how the coup directly  
162 affected financing structures and what mechanisms were put in place to absorb the suspension of external aid. There  
163 have not been many economic evaluation studies conducted examining the economic effect of the coup on OOPs or  
164 other financing schemes.

### 165 **The April 2023 War**

166 The violence that has erupted in Sudan on April 15<sup>th</sup> was triggered by a power struggle between the leaders of the SAF  
167 and RSF. The impacts on the health system have been dire and may constitute war crimes. The UN has estimated that  
168 9,000 lives have been lost (19, 20). As of October 18th, 2023, WHO has verified 58 attacks on health care of which 31  
169 sustained deaths and 38 injuries of health workers and patients have been verified by WHO (21). The Sudanese  
170 government’s ‘Combatting Violence Against Women Unit’ has reported that 88 incidences of conflict-related sexual  
171 violence have been verified(22). We feel these figures are very likely to be underestimates. The WHO has stated that  
172 70% of health facilities located in areas affected by fighting are out of service leaving only one third of hospitals  
173 operational in conflict zones.(23) In Khartoum, the most affected region, only 20% of hospitals fully functioning and  
174 43% are partially functional (24, 25).

175 The situation is further complicated by power shortages, looting and vandalism of facilities, limited medical supplies,  
176 and damage to critical infrastructure hampering the delivery of essential health care. The disruption of the national

177 vaccination programme comes amidst an ongoing polio outbreak. The majority of cold chain facilities have either been  
178 looted, damaged and/or destroyed, leading to the loss of over 600,000 vaccines. The nutrition crisis is dire; UNICEF has  
179 reported that Sudan currently has one of the highest rates of child malnutrition anywhere in the world (26).

180 This recent conflict has resulted in an estimated loss of USD 700million to its already underfunded health system (23).  
181 As the was continues to ravage the country, the full effects on the health system remain to be fully seen. This review  
182 revealed several gaps in the information and data available on the financing structure and its response to the crises.  
183 We attempt to fill these gaps with the findings from the interviews of key informants and experts.

184

## 185 Methods

### 187 Reflexivity

188 FB is a female Sudanese clinician and global health programme and policy professional who was undertaking her  
189 Master's in Health Policy at Oxford's Blavatnik School of Government during the project. She has experience working  
190 within the Sudanese health system as well as working at a number of UN agencies. LA is a male British clinician who  
191 works as a global health researcher and policy adviser in a wide range of high-, middle-, and low-income settings. He  
192 has led numerous national mixed-methods health system assessments for WHO and the World Bank, and has  
193 previously worked with health financing policymakers in Sudan. Both authors have masters-level training in qualitative  
194 research methods and previous experience conducting interviews.

### 196 Sampling and recruitment

197 We obtained a purposive sample of leading health financing policymakers and policy experts who have first-hand  
198 experience of working with or advising the national Sudanese Federal Ministry of Health (FMOH) before, during, and  
199 after the onset of the April 2023 conflict. Whilst up to twenty people meet these criteria in terms of their job title, we  
200 excluded those with no formal training or expertise in health financing. We used a snowball approach to recruitment,  
201 starting with two senior national health financing policymakers and an international health economic advisor who has  
202 supported the FMOH; all of whom were already known to us in our professional. We informed all potential interviewees  
203 about our aims and rationale, as well as our personal interest in the subject which relates to securing sustainable health  
204 financing in order to equitably extend access to essential health services via email. We aimed to perform sampling and  
205 analysis iteratively, stopping recruitment when we achieved thematic saturation (27, 28). As it was, our key informants  
206 only recommended two additional interviewees and no further suitable informants were found or recommended,  
207 reflecting a critical dearth of expertise in Sudan. As such, our sample size contained five key informants; a mix of men  
208 and women. No invited key informants refused to participate.

### 209 Modality

210 The 45-60 minute interviews were conducted remotely via the Zoom video-calling platform. Interview recordings were  
211 translated, when necessary, from Arabic to English and transcribed. Both researchers conducted the first three  
212 interviews jointly, and FB conducted the final three on her own. No one else was present in the interviews except the  
213 participants and researchers. Field notes were taken during the interviews. All interviews were primarily conducted  
214 primarily in English; the professional working language for all interviewees. We did not conduct repeat interviews and  
215 transcripts were not returned to participants for comments or corrections. Participants did not check the findings.

### 217 Analytic framework



We adopted a phenomenological approach as we were interested in understanding the experiences and perceptions of our key informants. We used the WHO national health financing framework to structure our analysis. The framework was developed in 2017 by WHO with the objective of providing support on health financing policy to its Member States to develop national health financing strategies, highlighting the different aspects of health financing policy which need to be analysed and addressed by countries from a universal health coverage (UHC) perspective. The WHO framework highlights the connection between health financing and overall health system objectives, directly and indirectly via the intermediate objectives (in Fig. 1). Of relevance to this study, the framework emphasises that the health financing system does not act alone in affecting the intermediate objectives and final goals; and rather requires coordinated policy and implementation strategies across the various health system functions.

The framework combines a normative set of goals that are embedded in the concept of UHC with a descriptive framework of the functions and policies that are part of all health financing arrangements. For the purpose of this study, our normative position is analysing the current financing structure and its response to crisis while exploring policy options that drive future reforms in health financing in line with achieving UHC. As such, our analysis was guided by the main four components on the left of the depicted framework: revenue sources and contribution mechanisms; pooling of funds; purchasing of services; policies on benefit design; and governance structure. We used these elements to analyse the current situation of the Sudanese health system financing landscape and how this is structured between federal and state levels; how the different sources of revenue/pooling mechanisms and benefits structures are adapted/utilised in times of political and natural crisis; and what governance structure guides this process.

*[Figure 2 here]*

*Figure 2: WHO national health financing framework*

We also drew from the Sparkes and colleagues Political Economy Framework (PEF) for Health Financing Reform which builds on the methods of applied political analysis and strategies to assess the power and position of key political actors to develop strategies to alter the political feasibility of desired reform outcomes. This framework can be used to analyse health financing reforms based on the roles and positions of different stakeholder groups and political structures of relevance.(29) We used this framework to identify players, their interests and motivations, and their power as we explored our key informants' perspectives of the effects of political volatility in Sudan on health financing structures – and the feasibility of any suggested policy recommendations.

## **Topic guide**

Based on the Political Economy and WHO national health financing frameworks, we developed a semi-structured topic-guide around seven open-ended questions. We used probing questions to follow up on cues. The guide was not piloted. Data were collected from June to September 2023.

251

252

**Current structure and impact of events:**

253

- What is the current health financing situation; and how does it vary by state?

254

- What has happened to health financing in Sudan since April 2023?

255

**Governance:**

256

- What are the governance structures that guide the allocation between states and in times of crisis?

257

- Who are the major actors? what are their interests what power to they yield?

258

**Reform:**

259

- From your experience, what would be a sustainable reform policy that could be further explored?

260

- How feasible is this suggestion?

261

- What political enablers need to be in place for this to succeed?

262

263

**Analysis**

264

We used a blend of inductive and deductive thematic analysis, with reference to the PEF conceptual framework and the WHO financing framework. The flexibility of thematic analysis allowed us to consider both manifest and latent content in data analysis. Analysis was conducted following the six steps outlined by Braun and Clarke; beginning with familiarizing the data, followed by generating initial codes, searching for themes, reviewing themes, defining, and naming themes and finally producing the final report.(30-32). FB led the analysis and LA independently coded three transcripts. Preliminary findings were discussed and refined iteratively. We used NVivo Open Code 4.03 software.

270

271

**Ethical considerations**

272

The study was carried out in accordance with the principles of the 1975 Helsinki Declaration. Participation was voluntary and informed written consent was obtained from all participants prior to participating in the interviews. Ethical approval was granted by the LSHTM research ethics committee. No research ethics committees are currently operational in Sudan. Ethical approval was granted on 7<sup>th</sup> August 2023 at 14:57 and the first recruitment email was sent at 10:17pm that same day. Recruitment ended on the 25<sup>th</sup> August 2023. Given the small number of informants and the potential risks involved if their identities were to be revealed, we do not present their specific job roles or personal characteristics, neither so we attribute quotes.

279

280

**Findings**

281

**1.Governance for Health Financing**

282

**1.1 Implementation challenges:** Whilst health financing reform has been high on the agenda of most stakeholders implementation has remained a key challenge. Sudan has financing plans and policies, as well as well-trained staff and

283

284 administrators in many regions and levels of the health system. However, indistinct lines of accountability and that lack  
285 of consensus around what each team is responsible for stymies operationalisation.

286 *“In 2016 we developed and disseminated the National Health financing policy, which is stated clearly, the*  
287 *functions and the role of each level. But I think like other policies and strategies, we have the implementation*  
288 *challenges regarding the this clarity of all our responsibilities”.*

289 *“We have many forums. We have many joint committees. We have technical working groups. But .. we need*  
290 *to add ... the word effective for each. Effective communication, effective planning, effective coordination,*  
291 *effective implementation. Because most of our resources are lost at during this inefficiency ... all the time you*  
292 *have meetings. But what then then the implementation?”.*

293  
294 For programs funded by the Government, most programs are centralized and, depending on state capacity, funds  
295 are redirected to each respective state. There is no clear mechanism by which this distribution happens and is mostly  
296 based on ad hoc requests made by the state.

297  
298 *“What I hadn't appreciated before we went was the lack of consensus around what should be done at state*  
299 *level and what should be done at federal level. How any federal level resources should be shared around to*  
300 *states in terms of a fair shares allocation if you like. How resources should be pulled and who should manage*  
301 *those resources”.*

## 302 303 **1.2 Federal vs state Financing Allocation**

304 According to key informants, funding to states does not go through the FMOH but through the Federal Ministry of  
305 Finance which then distributes resources to state Ministries of Finance. There is no clear mechanism by which this  
306 distribution happens and is mostly based on ad hoc requests made by the state. In states where there is insufficient  
307 health system capacity, these requests are less forthcoming, meaning that the provision of funds is inversely  
308 proportional to state health system capacity. Capacity at state level is complicated by lack human resources for health  
309 (who primarily reside in urban areas and/or are lost to ‘brain drain’) and more importantly, deficiency in managerial  
310 capacity.

311 The resulting financing structure remains opaque with an array of funding sources further complicating the multi-  
312 tier system and lacked a clear system and/or policy that demarcates and coordinates the funding lines for each. This  
313 creates a diverse picture ranging from very well-developed financing models and revenue raised to poorly funded  
314 state systems.

315 *“It depends in in a large part It depends on the on the strength of those who are responsible for health at the*  
316 *state level. You know, they, because it's like a cake or a steak; each one wants to take the biggest part at the*  
317 *state level. So some of our DGs [Director Generals] at the state are really very strong and convincing... Some*

318 *of the DGs or ministers of health are a little bit weak, some of them shy, some of the ministers of finance are*  
319 *completely against health. It's not their priority."*

320 One participant commented on how this unclear financing allocation mechanism has resulted in a vast disparity  
321 between the states.

322 *"You've almost got all these little different economies that together comprise Sudan. So some were very poor,*  
323 *some states very poor, very poorly resourced, not very strong governance, lots of - even diversity within those*  
324 *states in terms of their capability of raising tax or collecting money, getting payments for any health services.*  
325 *And other states quite mature. In terms of how they were, how they were progressing".*

## 327 **2. Revenue raising through the National Health Insurance Fund (NHIF)**

328 The NHIF is situated under the Ministry of Social Affairs and collaborates with the FMOH. NHIF revenues come  
329 primarily from (compulsory) civil servant tax contributions with a small proportion of contributions from the Ministry  
330 of Finance covering 'poor populations', and voluntary contributions from those working in the informal sector. There  
331 is no clear definition of 'poor', leading to a mix of under- and over-coverage depending on the region. Only 55.8% of  
332 the population is covered by insurance, mostly from the formal sector and residing in mostly urban areas. This makes  
333 NHIF look more like traditional private medical insurance than true social health insurance.

334  
335 *"You can't talk about equity at any how because you are just focusing on people who are working in urban*  
336 *area where the health services are provided. So it looks just like a medical insurance rather than social health*  
337 *insurance...If we cover the informal sector at that time, this means that we are talking about equity because*  
338 *most of this informal sector are distributed in the rural area and they are facing the challenges. But the*  
339 *problem is that the definition of informal sector in Sudan is not clear at all."*

340  
341 NHIF funds were originally topped up by the Ministry of Finance (using general tax revenues), but these transfers  
342 have stopped since the war started in April 2023, fully exposing the insurance fund to a decline in voluntary  
343 contributions. Participants highlighted the lack of incentive for enrolment for individuals in the informal sector where  
344 service provision is sub-optimal. Covid-19 and the war have reduced the resources available for improving the service  
345 offer in rural areas, which has made it even harder to convince people that it is worth paying for insurance. This  
346 vicious spiral of diminishing services leading to diminishing voluntary contributions threatens to completely  
347 undermine the NHIF.

348  
349 *"So when [the national] Minister of Finance faces this problem and or this challenge is of course when they*  
350 *start to cut the budget due to the armed conflict and even the translation In Sudan, NHIF have been affected*  
351 *immediately. Why? Because they lost more than 70% of their total revenues. It's a problem."*

353 *“After the war, there is not any cash transfer from the Minister of Finance and now in NHIF incur this debt*  
354 *and this loss in most of the States and many providers and many facilities now start to stop the contract with*  
355 *NHIF”.*

356  
357 Two of the interviewees felt that the future sustainability of the NIHF depended on being able to draw on a blend of  
358 revenue streams, not just contributions from public servants.

359  
360 *“The best way is the mixed way. Between tax and between insurance, because you see, you can't rely on the*  
361 *tax base for sure. And even due to these challenges regarding the informal sector, you can't rely on the*  
362 *insurance. You can't collect money from all the population. So I think the best way is to have this mix but with,*  
363 *with precaution we have to revisit the inclusion criteria of targeting of this vulnerable group.”*

### 364 **3. Risk pooling**

365  
366 **3.1 High OOP and lack of risk pooling:** The war has crippled the economy, slashed tax receipts, and led to government  
367 spending reallocations away from the health sector. However, our interviewees felt that the greatest threat to  
368 Sudan's medium- and long-term health financing is the lack of risk pooling. Clearly the war has made it much harder  
369 to institute pooling reforms, however OOP spending accounted for 74% of health expenditure before the war.

370 *“The biggest challenge that I think they was faced then and still faced and will be still faced in ten years' time*  
371 *is this the risk-shift. So regardless of the conflict. Even if the conflict were resolved now.”*

372  
373 *“At the moment, the financial protection risk sits with the patient. You know, the level of self-pay is*  
374 *enormous... Through risk pooling and risk sharing and financial protection arrangements. It's being paid for*  
375 *by individuals and out of their pocket”.*

376  
377 Participants agreed that change required a significant cultural shift, and that devolution may be an important  
378 ingredient in reform.

379  
380 *“Shifting so that the government taking responsibility or a national health insurance fund taking responsibility*  
381 *for risk pooling is a huge, huge cultural shift. And that to me is the largest single challenge. That I think will*  
382 *be faced in health financing policy in Sudan.*

383  
384 *“In the long term I could see a situation where each state had its own, that would be like, you know, there*  
385 *would be some federal funding equalization; funding distribution down to the state level. From central*  
386 *taxation or federal taxation. But you would have much more local ability to build up risk pooling not just*  
387 *across the population but over time which is what you're talking about. You know, it's not just about*

388 *protecting individuals who fall ill. By everybody chucking in, like an insurance model does, you're also*  
389 *temporarily protecting risk because you're allowed to save and build up reserves and funds. And I think that*  
390 *could be done at a state level. Without question."*

391  
392 **3.2 Equity and the lack of adequate coverage of the population** was an aspect widely covered by the participants.  
393 While the NHIF provides coverage for those in formal areas of work (i.e., civil servants), a significant proportion of  
394 the population works in the informal sector. The lack of incentives of the NHIF service delivery is a significant barrier  
395 to attracting individuals from this group, creating considerable inequity in access to health services.

396 *"You can't talk about equity at any how, because you are just focusing on people who are working in urban*  
397 *areas where the health services are provided."*

398  
399 *"We are talking about the primary health care services. It should be, I would like to say, free of charge for*  
400 *everyone in Sudan. This is not the case...unfortunately, and should be completely paid by some, somebody.*  
401 *This somebody is health insurance in Sudan, of course. This is written in our policies, in all our strategic plans,*  
402 *in their, the health insurance fund strategic plan itself and so on".*

403  
404 The Sudanese government identified 'poor' families as eligible for funding under NHIF and funding for this  
405 amendment of the NHIF was provided directly from the Ministry of Finance. However, a recurrently mentioned  
406 obstacle to this addition was the absence of a clear definition of what 'poor' constitutes. There are no clear thresholds  
407 for income levels and/or other criteria to fulfil the 'poor' requirement. Considering that a large percent of the  
408 Sudanese populations is under the poverty line, that would infer that all Sudanese are eligible for coverage under  
409 this eligibility criteria.

410  
411 *"So I don't want to say that health insurance fail but I think that it was very challenging to cover the informal*  
412 *sector after that in 2017 the the the contribution of informal sector in NHIF is very low, very minimum, very*  
413 *minimum, OK. Then the government try to change the policy and start to the target, the poor families. OK,*  
414 *and since 2017. It was very huge influx of poor families or enrolment under the umbrella of NHIF maybe 1 to*  
415 *2 million household per year greater coverage of NHIF from forty-something-percent up to more than 85%,*  
416 *and this is a current NHIF covered. What do you know at that time we face what many or countries face when*  
417 *you are targeting support families. The inclusion criteria again, what do you mean by poor families? So by*  
418 *the end of the day, all the Sudanese, if they are rich or if they are poor, they are urban or rural. They are*  
419 *involved in free scheme".*

### 420 421 **3.3 Community engagement**

422 Increasing insurance coverage and community participation in the NHIF was a prominent theme among participants  
423 who highlighted the need to develop a community-targeted strategy to encourage and attract enrolment of those  
424 working in informal sectors and to improve risk pooling. However, this requires a large degree of community  
425 engagement and trust building to incentivize enrolment by building momentum from existing grass root and  
426 community movements that have been central and instrumental in the covid-19 response and during the ongoing  
427 conflict in providing health services and awareness raising.

428  
429 *“for me the biggest challenge is the lack of risk pooling that to me is fundamental issue. I mean it's such a*  
430 *huge, huge It's such a huge disconnect... That even if you were to sort of push for a social insurance type fund*  
431 *or a push for the National Health Insurance Fund to be, you know, all-encompassing with a safety net*  
432 *provided by government funding. You know, all the things we recommended. You'd have to have Such a*  
433 *strong community”.*

434  
435 *“During NHIF we try to use the communities to motivate them to encourage them to enrol in the NHIF*  
436 *basically, and sometimes we try to give them tasks like a we can recruit the doctors, but we don't have*  
437 *residence for him, for example. So as community we can give him house or anything like that and and usually*  
438 *usually especially in the rural area we we we realise a very strong commitment and response from the*  
439 *communities because now ... they are able to calculate what they will gain and all they lost. So the community*  
440 *is a huge opportunity that is not used in Sudan”*

441 Two of the participants felt that a greater emphasis on providing guidance around how to conduct community  
442 dialogues would help to generate demand for services and encourage voluntary contributions from those in the  
443 informal sector.

444 *“But I think the biggest obstacle is. He's a cultural one. And I think it. I think it if there's a sort of groundswell,*  
445 *I guess of support I felt. Community and community engagement which would support that kind of universal*  
446 *health coverage. Fair access for everybody we all look after each other”*

447 *"Why [are voluntary NHIF contributions so low]? Because there is no community dialogue guidelines. There*  
448 *are no guidelines for community engagement framework”.*

449 *“I mean that's the one thing we you know when you're developing a central health benefits package; you*  
450 *know the first thing the guidance says ... community engagement must start, you know. You engage your*  
451 *population, get to community. And that same goes for health financing...It was the one thing we couldn't do*  
452 *because of the political sensitivities. And yet there are community groups already established. You know,*  
453 *many of whom were active in the the democratization of Sudan. Or the attempted democratization of Sudan*  
454 *in the in the 2019 initiative. Many of those groups exist and could be used as platforms for having the*  
455 *discussions that need to be had”.*



#### 4. Purchasing and Service Delivery

**4.1 NHIF as purchaser and provider:** While coverage and entitlement to service under the NHIF expanded with the inclusion of ‘poor families’, this did not necessarily translate to increased and improved access to service. There is confusion about which health services are covered by NHIF, and which services are purchased directly by the FMOH. In addition to acting as a purchaser of service from the MOH, the NHIF also has its own service providers without a clear demarcation between the purchase-provider functions. The FMOH adopted a policy to separate and refocus the roles of the NHIF as the purchaser of health services, and MOH as a provider of government health services, however, the implementation of this policy is incomplete (33, 34) . As such, there are two state-backed, poorly integrated systems operating in Sudan.

*“And the National Insurance Fund had sort of launched... When we looked from afar, it looked like it was almost a separate health system because there was not a great connection between the National Health Insurance Fund- and state-funded health systems. There was a commitment to separating purchasing and providing and that the National Health Insurance Fund was essentially going to become the purchaser. And the ministry's hospitals and facilities would be governed as a provider. But that policy hadn't really been implemented”.*

*“In Sudan here there are two modality of service provision under the context of NHIF. One of them is the purchasing from the facilities that affiliated to the Ministry of Health and the other is a NHIF facilities which it's owned by the NHIF.... So now there is the problem of accessibility to services. Because of these facilities are not capable ... there is a problem of integration of services”.*

**4.2 Inadequate service delivery:** Budget capture by secondary and tertiary care seems to have made it difficult to purchase adequate primary care services in many areas. Desire to extend health coverage to these underserved populations may drive some of the instances where the NHIF strays from purchasing into direct service provision.

*“There is a policy, there is that regulation, this commitment during the budget development that we are going to allocate so and so [to primary care], and we have to follow Abuja declaration on other. But when we come to the reality, we realise that most of the resources, most of the resources goes directly to hospitals and goes directly to the tertiary level which provide do you know services for only 20% of the population”.*

*“ the health national health insurance fund is in some states they take a lot of a burden of giving the, even, they even, what do they call it? They establish the service. They build the the facilities which is not their role. It is our [MoH] role. Their role is to provide the service, you know, to pay for it, not to provide it... While we try to provide the service and prepare the facilities and train the people and do all that”.*

#### 5. External Donor funding



489 **5.1 Verticality and fragmentation:** Currently, 6% of health expenditure is from external donors, however it remains  
490 vertical and fragmented with different donor organization having different mandates and scope of work. Per  
491 participants' accounts, budgets are developed in accordance with donor's budgeting principles and priorities that do  
492 not always align with actual needs, particularly those of individual States, and do not reinforce integration efforts  
493 within the wider health system. Most donor funds are earmarked for specific programmes e, g. HIV, malaria, etc.  
494 which can create very fragmented funding streams with little integration into the overall system. Funds are mainly  
495 made to the FMOH despite the fact that most implementation occurs (or ought to occur) at State level. There is no  
496 accountability at State level to ensure funds are absorbed and activities implemented. However, weak State-level  
497 capacity has rendered donors hesitant to pay States directly but this has thereby resulted in a much-fragmented  
498 system of channelling funds to state level.

499 *"we talked many times about the verticality we talked many times and all the time, I think now is the time to*  
500 *take action. We can't go very well in immunisation but very bad in nutrition, very well in this, it is very bad.*  
501 *This will impact the overall output our total impact, the impact indicator of the health system..... So it's*  
502 *just looked like fragmenting. This is not our effort. We provide more than that. So this verticality not affect*  
503 *the finance, only it affect the service delivery affect the health information and we have to use the hat of the*  
504 *health system thinking and not to focus only on the. So this is the very important the number three to address*  
505 *this verticality and time by time it's a very good thing".*

506  
507 **5.2 Coordination of external donor funding:** In the recent conflict, there is heavy reliance on donor funding from  
508 development partners. This has effectively diminished the government's decision-making power and while there is  
509 some degree of coordination of how the funds will be spent, the locus of decision-making has shifted beyond the  
510 borders of Sudan. Participants asserted that coordination efforts between partners is also managed by an external  
511 organization, which creates a missed opportunity to include state and district level stakeholders and erodes the  
512 government's ownership and oversight over health spending. There is a desire for joint planning and implementation  
513 between the government and donors, married with an acceptance that this is unlikely to happen. The fact that the  
514 government does not have control of all areas of the country compounds the issue.

515 *"Joint planning, joint implementation, and joint reporting as well - I don't think this is possible. For instance,*  
516 *to have joint budgeting, because yeah, it's like, neither the government nor the partners would like to bring*  
517 *and pull their resources in one place, but it's still. Having joint planning, joint implementation, for example,*  
518 *this might together reduce any inefficiencies might come up during the implementation. That's one of the*  
519 *key issues".*

520 *"So, for me, for me in general, during humanitarian settings the control of government will come down and*  
521 *then because most of the time, sometimes the government cannot access areas of, conflict for instance.*  
522 *Access areas where RSF there and RSF cannot access the area of where SAF is controlling. So the control of*

523 *government during humanitarian setting is usually less And that's why what they are doing right now just to*  
524 *have this coordination mechanisms to make sure that things in the ground smoothly. For instance, UN*  
525 *agencies right now have huge shipments. From Khartoum from Port Sudan, through Aljazira to Kosti to be,*  
526 *send it to some of Kordofan states and also East Darfur But OCHA is leading the negotiation with SAF and*  
527 *RSF How to have. Safe movement of this logistics. Because there is no one government controlling on the*  
528 *ground. So, and that's why the main, yeah, so. I think that's, my sense. The government is just like*  
529 *coordinating. They don't have the power to control everything and so on”.*

## 530 Discussion

531 Perhaps surprisingly, our key informants felt that the greatest challenges to Sudan’s health financing came not from  
532 the recent conflict, but from underlying structural issues: the governance structure, revenue raising model, high self-  
533 financing payments for health, and fragmentation of funding sources. The main source of NHIF funds is from  
534 compulsory contributions from civil servants which constitutes only 13% of the population; the remaining funding of  
535 NHIF coming from the Ministry of Finance providing coverage for ambiguously defined ‘poor’ populations. The  
536 remaining proportion of the population are categorized under the informal sector who find no incentive to enrol under  
537 the NHIF. The considerable disparity between the States in terms of funding and capacity to raise revenue has led to  
538 stark disparities in health financing and funding of services. Lastly, external donor funds, while being crucial to the  
539 function of many key FMOH services, have fragmented the flow of funds to the health system and exacerbated  
540 inequalities between states. The total amount of money flowing through the system has fallen dramatically as funds  
541 have been diverted to defence spending, and external support has been withdrawn. However, service provision was  
542 already poor before 2023, and the vast majority of health spending was already out-of-pocket. As Sudan looks to the  
543 future, the great priorities are around developing community advocacy for risk pooling and essential health services,  
544 with much greater coordination and clarity around the roles of Sudan’s various federal and State purchasers and  
545 providers.

546 **Military coups** are not uncommon in low- and middle-income countries particularly in the African continent. As of  
547 2022, 45 of the Africa’s 54 countries have suffered one or more coup attempts. On average, African states have  
548 suffered four coup attempts since their independence, with Sudan experiencing the most (a total of 17), including two  
549 in the previous year (35). This shows an increasing trend with 13 percent of African countries suffering coups in the  
550 prior two years, comprising a six-fold increase from just four years earlier (35). The long-standing political turbulence  
551 in Sudan has certainly taken its toll on the health sector, but research examining the effects of politics is scarce. Storeng  
552 and Mishra observed that studies on health systems strengthening while emphasising the technical and managerial of  
553 health systems scarcely gave attention to ‘the politics and social relations that shape health systems’ (36). While the  
554 WHO Commission on the Social Determinants of Health recognises that health inequities arise from ‘a toxic  
555 combination of poor social policies and programmes, unfair economic arrangements, and bad politics’ (37) there is a  
556 lack of recognition of public health emergencies that are of a more political nature as an existential threat to health  
557 systems. The case of Sudan is an exemplary representation of such circumstances.

558 **Health purchasing** can generally be defined as the allocation of pooled funds to the providers of health services(38).  
559 Ideally, a ‘strategic’ form of purchasing promotes efficiency and quality provision of services would be based on target  
560 population, national health priorities, and cost-effectiveness of selected interventions (39). The current service  
561 provision structure in Sudan is broad in scope and entitles its beneficiaries to a range of free healthcare, mainly primary  
562 care including medical consultations from PHC providers, general practitioners and specialists, laboratory  
563 investigations, and medical imaging (e.g., CT Scan and MRI). For medicines, users are expected to pay 25% of the cost.  
564 Despite this broad nature of coverage of the current package of health services delivered in Sudan , there are many  
565 challenges to its efficiency mainly related to funding which has to a large extent led to the high proportion of OOP  
566 expenditure in Sudan (33). A provider payment mechanism (PPM) i.e. the money which is transferred from a  
567 payer/purchaser to a provider of service as compensation for the delivery of the health services, must be agreed upon  
568 and institutionalised to ensure fair and equitable access to health services (40) while mitigating providers’ incentive  
569 to select healthier patients or over-providing of care (41).

570 In the case of Sudan, there was no clear distinction between purchasing and provider functions of the NHIF. In 2019-  
571 2020, and commissioned by the WHO, a Health Benefits Package (EHBP) and a Provider Payment Mechanism (PPM)  
572 for the Health System of Sudan was designed to support the overall aim of health financing reform in the country  
573 following the establishment of its new transitional government. The project proposed that the NHIF’s role in the  
574 financing system should be confined to ‘payer’ or purchaser, while service delivery relegated to the Ministries of  
575 Health; a proposal much welcome by most of the study participants. Under the proposed separation of payer and  
576 provider functions, each SMOH would be considered a single provider of MOH services within each State, with a  
577 separate agreement with NHIF for the provision of health care for the state population. Furthermore, the project  
578 proposed establishing a standard and consistent PPM model used by NHIF to pay SMOH for service delivery while  
579 preserving state flexibility through mixed payment models for SMOHs to use to fund different SMOH health care  
580 outlets. The proposal also noted the various challenges this would inevitable face including the inequity in  
581 epidemiological and economic status across states (33); in addition to the political and security challenges faced by  
582 conflict-prone states that would hinder effective service provision (33, 34). The political instabilities, coup and most  
583 recently the war in Sudan has hindered implementation.

584 **Risk pooling** or lack-there-of, was a prominent theme in the results of this study. The current structure of the NHIF  
585 caters to primarily those in the formal sector who constitute only 13% of the population. Services that are currently  
586 delivered under the NHIF are not consistent or comprehensive and while they may be free in theory, many services  
587 may not be available at all, or be of poor quality (33). The unattractive structure of service delivery has proved  
588 ineffective in attracting subscribers from the informal sector to the NHIF. Furthermore, providers charge co-payments  
589 or full payments for access to services to supplement the funds they receive from the SMOH, NHIF, and NGOs  
590 (33)which places a high burden for OOP costs and limits the effectiveness of risk pooling intended by the establishment  
591 of the NHIF (42). In fact, a recent study showed that insured and non-insured citizens had similar OOP payments in  
592 public healthcare facilities that led to catastrophic expenses which not only affected the poor but also the highest

593 quintile of the population (42). The same study suggested that the NHIF has ‘failed to protect people against health-  
594 related financial hardship’ and indicated many factors that have resulted in this failure including low coverage of the  
595 informal sector, low quality of provided health care services provided to insured people, and most crucially, lack of  
596 coordination between the NHIF and FMOH to establish efficient and effective financial agreements to protect people  
597 from catastrophic health expenditures (42, 43).

598  
599 Risk pooling refers to the subsidization the health population extends to the ill and spreading the financial risk of costs  
600 borne from seeking healthcare among the population (45, 46) Lack of risk pooling typically results in a negative  
601 correlation between health and costs of care; costs of which, in the absence of risk pooling, would be endured largely  
602 by the ‘sicker’ population. (45, 47). This is inconsistent with the objective of financial protection and equity of access  
603 to services in relation to need (45). Pools can generally be categorized based on mode of participation into on  
604 compulsory, automatic or voluntary. Typically, pools comprised of compulsory coverage is compulsory or automatic  
605 for all population groups and have a more diverse mix of health risks. Conversely, pools comprised of voluntary  
606 membership, individuals with higher risks are more likely to enrol than people with lower health risks leading to an  
607 inadequate diversity of healthier and sicker people, and the costs of care would be significantly higher than for the  
608 average in the same population limiting potential and efficacy of risk pooling (45, 48). In the case of Sudan, the lack of  
609 incentives to enrol in the NHIF, with OOPs remaining similar for those enrolled and those not enrolled, results in lower  
610 levels of risk pooling, and burden of health expenses borne by the less advantaged populations.

611  
612 However, the extent to which a health system effectively achieves its risk pooling objective is largely conditional on the  
613 amount of revenues raised among other factors (45, 49). The capacity of a country to raise resources depends on its  
614 economic status and national income and can be classified as either compulsory or voluntary; the former relying  
615 primarily on taxes and other governmentally levied charge; and the latter mostly sourced from OOPs (50). The Federal  
616 Ministry of Finance is the major contributor in financing NHIF (72%-mainly from tax revenues), followed by the para-  
617 statal organizations (12.7%), while households’ contribution is at approximately 9% (51). A tax-based or tax-funded  
618 system, such as the NHIF, is very sensitive to economic and fiscal policies and shocks to the national economy and  
619 ‘fiscal space for health’ i.e., how much a country can spend on health depends on how much revenue it can raise from  
620 tax, how much is available to spend by government and finally what share of this can be spent on health (50); rendering  
621 sustainability questionable at best .

622  
623 At present the main source of health financing is the NHIF compulsory premiums which represent only 13% of the  
624 population while the remaining sources are the Ministry of Finances’ contribution towards the ‘poor’ populations and  
625 OOPs. The study participants almost unanimously expressed their strong support for a mixed sourcing of revenue  
626 raising i.e., increasing the NHIF pool by increasing the enrolment into the Fund while ensuring taxes are used to ‘top-  
627 up’ the Fund resources. This is line with many studies that collectively agree on ‘a serious need for additional financing  
628 sources’ to the NHIF (52). The mixed source of financing for the NHIF would limit- to some extent- the reliance of the

629 NHIF on tax subsidies and thereby the implications of financial and economical blows to the Sudanese economy which-  
630 as witnessed in the most recent conflicts- severely depress the government’s ability to contribute to the NHIF (52).

631  
632 A mixed or blended form of revenue raising requires significant increase in citizen contribution into the NHIF. As  
633 highlighted by the study participants, there is a lack of trust between communities and the NHIF with respect to  
634 efficiency and quality of services provided. Community engagement is a powerful and necessary tool in expanding NHIF  
635 subscription among the mostly informal sector population. Community engagement not only serves the purpose of  
636 establishing accountability on NHIF and MOH, but also relegates decision-making processes to the local level (53).  
637 Community engagement has not been a priority for the FMOH and no guidelines for community engagement were  
638 developed to encourage dialogue. It was only recently a community engagement dialogue project was completed in  
639 North Darfur which was the first to develop a ‘Community engagement Dialogue Framework’ and it remains to be  
640 context-specific. Strategies suggested to improve citizen participation in NHIF have included active recruitment,  
641 simplifying the process of enrolment, reaching citizens in their places of work and even making health insurance a  
642 condition for attending public healthcare facilities (51) although in light of the limited service availability, this would be  
643 very counterproductive and would rather increase inaccessibility.

644  
645 The stark variation between the different States in terms of health system capacity and ability to raise funds is  
646 consequential when designing reform policy and developing a blended or mixed PPM. The federal and state  
647 designation of roles and responsibilities albeit as opaque as it is- also creates complication – alongside the political  
648 complexities and ethnic sensitivities that exist between states. There is a pivotal need to develop allocation  
649 mechanisms that account for population size, population needs, state capacity to raise tax, and state health system  
650 capacity to provide services - in addition to accommodating for special needs, particularly for conflict-prone states  
651 such as the Darfur states. This should ideally be supplemented by funding from NHIF at federal level; this approach  
652 would be context-sensitive and specific, observant of state level needs while allowing for state flexibility in raising  
653 revenue and self-identifying needs; thus, weaker and ‘poorer’ states would be more eligible for federal support. The  
654 federal level is instrumental in aligning these allocation mechanisms while ensuring political feasibility of application.

655  
656 A third source of resource-critical for many LMICs health systems are external donor funds. While external financing is  
657 critical for many LMICs, external financing has come under scrutiny in recent years for infringement on country  
658 ownership, fragmentation of service delivery, inefficiency and diverting experienced civil servants from government  
659 positions (54, 55). A recent review of health financing in fragile and conflict-affected setting found that external aid  
660 coordination was the largest single topic within the themes of the study, likely reflecting the strong influence of  
661 external players (56). Similarly, Sudan is heavily reliant on external donor funds for many key health services e.g., HIV,  
662 TB and malaria through the Global Fund; vaccinations through Gavi the Vaccine Alliance; and broader health service  
663 support through the World Bank among many others. Donor funding flows directly to the FMOH which then funnels  
664 the grants/funds to states and localities. Partner-funded programmes are not well integrated with local or national

665 services; for example, an ANC health facility may be extremely underfunded but may receive excellent support in its  
666 vaccination programme, creating a confusing picture when it comes to overall health outcomes. This verticality does  
667 not serve reform purposes and rather creates further division and opacity in terms of funding streams.

668  
669 The verticality of donor-funded programmes is well documented in the literature, and despite the agreed need for  
670 better coordination between donors and recipients, the literature tends to focus on efficiency and effectiveness rather  
671 than duplication and ownership.(57). In the recent crisis, and with the almost complete collapse of FMOH functioning,  
672 external funding has been essential to maintain many basic services in Sudan. In the absence of strong FMOH  
673 leadership, this has meant that donors have been left to operate in complete independence and will full autonomy,  
674 with little to no influence from the FMOH. As the conflict has evolved, the FMOH has regrouped, reorganized and  
675 began to operate from remote locations, however, there is a great need for improved coordination between FMOH  
676 and donor organizations with national bodies taking on more stewardship roles. Study participants reported an  
677 abundance of mechanisms designed to improve coordination, however effective implementation is where they have  
678 all come short. The political instability in the country in recent years has further fuelled this lack of progress with  
679 considerable reliance on communities and grass-roots movements such as resistance committees.

## 680 681 **Conclusions**

682 The study has highlighted the deep-rooted challenges in the health financing system in Sudan. Despite the conflict,  
683 Sudan retains the basic health financing apparatus in the form of state and federal ministries, a basic national insurance  
684 fund, and basic health services. These elements can be reformed and leveraged to improve resilience of health  
685 financing in the face of the current and future crises. Whilst the current NHIF is clearly flawed, it represents an  
686 important vehicle for extending financial risk protection and the extension of essential health services. It is currently  
687 primarily funded through government taxes and contributions of premiums from the formal sector. The most pressing  
688 need is to include informal sector workers. OOP remains among the highest in the region, despite the country being  
689 one of the world's least developed countries. Better pooling policies and revenue raising mechanisms are needed to  
690 improve equitable access to healthcare in Sudan. The vast discrepancy between states in terms of state capacity and  
691 health system capacity demands a tailored approach to allocating mechanisms between federal and state level funding.  
692 Lastly, external donor funded programmes must be better integrated into PHCs and reduce fragmentation within the  
693 broader health system. Based on our findings, we propose the following policy options to develop a more resilient  
694 health financing structure in Sudan:

### 695 696 **Recommendations**

#### 697 **Reform of existing NHIF fund:**

698 Despite the flaws in its design, the NHIF has shown some degree of stability in the face of major crisis. Efforts can be  
699 made to reform the NHIF to improve equity and efficiency and support the resiliency of the Sudanese health financing  
700 model. The reform policy must include:



- 701 • **Develop a blended system of NHIF revenue raising** that combines tax and premium based insurance  
702 contributions. This has multiple benefits: a) increases solvency and allows for less reliance on tax  
703 contributions lessening the impact of fiscal austerity and economic decline; b) improved risk pooling and  
704 reduces the moral hazard and adverse selection effects; c) more equitable form of coverage.
- 705 • **Develop a community-targeted strategy to encourage enrolment of those working in informal sectors.** The  
706 FMOH/NHIF should leverage momentum from existing grass root and community movements that have  
707 been central and instrumental in the covid-19 response and during the ongoing conflict in providing health  
708 services and awareness raising in their community engagement strategies.
- 709 • **Establish clear definitions of what constitutes informal sector and ‘poor’ populations:** Despite the NHIF’s  
710 annual update of selection criteria, for example, by adopting the World Bank (58) international poverty line  
711 of \$2.15 per person per day using 2017 PPPs. Since 2014, there are no official poverty statistics (58) and  
712 data collection methods are not robust enough to collect needed information to categorize and determine  
713 eligibility criteria. A robust and preferably digitalised data collection method would support not only  
714 identifying eligible participants, but broadly speaking, would support more efficient tax raising efforts,  
715 particularly at state level. FMOH and NHIF should leverage existing partner-funded (e.g., UNICEF,GAVI and  
716 the Global Fund) DHIS2 strengthening programmes (5, 59) to inform NHIF eligibility criteria.
- 717 • **Innovative pooling of funds within the NHIF for emergencies and crises:** An innovative pooling mechanism  
718 that includes donor funds, private sector and other religious institutions could support the existing  
719 emergency reserve within the NHIF. This must include clear and specific trigger mechanisms under the  
720 control of FMOH and NHIF, and allocation specific instructions. For example, the World Health Organization  
721 in Sudan is working closely with the FMOH to develop an emergency prioritisation strategy to identify  
722 essential interventions in cases of emergencies. There must be strong alignment with these two siloed  
723 activities to avoid duplication of efforts and maximize efficiency of any reserved or emergency funds.

## 724 **Strengthening Policy Implementation**

725 The FMOH in collaboration with development partners has a multitude of existing policies, plans and strategies for  
726 financial reform. However, these have not been coupled with implementation and monitoring plans. Moreover,  
727 there is no framework to hold underperforming partners accountable. To improve implementation and  
728 accountability during the current crisis and beyond, the following is suggested:

- 730 • **Invest in capacity building particularly at state level:** Most states do not have the capacities to inform their  
731 health financing policies and/or implement them. Led by the FMOH, institutionalizing a structure similar  
732 to the technical steering group at state levels could support local training and capacity building efforts to  
733 accelerate implementation.
- 734 • **Improved coordination with development partners to create synergies with existing programmes to better  
735 respond to emergencies:** in a country such as Sudan which is prone to armed conflict and natural disasters,  
736 more effort must be placed in anticipatory coordination with external donors and partners to align

737 priorities and resources. At the moment there are emergency ad-hoc/monthly/bi-weekly ‘National Health  
738 Sector Partners’ Forum/Cluster’ meetings between FMOH/SMOH, primarily led by development and  
739 humanitarian partners working from various locations inside and outside of the country. This is a good  
740 strategy to coordinate collective efforts and prevent duplication, that can be leveraged post-conflict by  
741 instituting biweekly/monthly cross-sectoral health management committees but this must be led by the  
742 Planning Directorate at FMOH- and include SMOH, development partners, and civil society- to ensure  
743 ownership and integrated, streamlined processes(60).These committees will regularly review national  
744 policies and oversee implementation progress.

745 ○ **Strong governance for health.** For the above recommendations to be successful, strong leadership and  
746 commitment is necessary from the Ministers at head of FMOH and Federal Ministry of Finance.  
747 Policymakers within the Planning Directorate at the FMOH should start by making the business and  
748 economic case for government investment in health to advocate for more spending on health (33) to be  
749 discussed and disseminated with relevant stakeholders.

750

751



752 **Funding**

753 The authors received no specific funding for this work

754

755 **Competing interests**

756 The authors have no competing interests to declare

757

758 **Data availability**

759 No data beyond those presented in the manuscript are available. This is to protect the interviewees.

## References

1. World Bank. Data Bank-Sudan.  
<https://data.worldbank.org/indicator/SP.DYN.LE00.IN?locations=SD2021>.
2. World Health Organization. The Global Health Observatory.  
<https://www.who.int/data/gho/data/countries/country-details/GHO/sudan?countryProfileId=5a92f4a8-6f03-4792-b92f-fdbf4dbfa627>.
3. World Health Organization. Outbreak and Crisis Response Appeal 2023.  
<https://www.who.int/emergencies/funding/outbreak-and-crisis-response-appeal/2023/2023-appeals/appeal-sudan2023>.
4. United Nations Conference on Trade and Development. UN List of Least Developed Countries.  
<https://unctad.org/topic/least-developed-countries/list>.
5. WHO Regional Office EM. Country Cooperation Strategy for WHO and Sudan 2022–2025. 2022.
6. Hassanain SA, Eltahir A, Elbadawi LI, editors. Freedom, Peace, and Justice: A New Paradigm for the Sudanese Health System After Sudan's 2019 Uprising2022: Economic Research Forum (ERF).
7. Osman AK, Ibrahim M, Elsheikh M, Karrar K, Salih H. Saving the Fundamentals: Impact of a Military Coup on the Sudan Health System. Sudan journal of medical sciences. 2021.
8. Yuan S. Hospitals closed amid Sudan violence. Lancet. 2023;401(10386):1412-.
9. Berridge W, Justin L, Raga M, Alex De W. Sudan's Unfinished Democracy The Promise and Betrayal of a People's Revolution electronic Vol 1. First ed. Oxford: Oxford University Press; 2022.
10. Health FMO. Sudan National Health Policy 2020. 2020.
11. Osman AKE. The transition from a vertical program to a health systems strengthening approach in the GAVI support to Sudan: literature. 2021.
12. Bank W. Moving toward UHC: Sudan. 2017.
13. Organization WH. Global Strategy on Human Resources for Health: Workforce 2030. Geneva, Switzerland: World Health Organization; 2016. 2023.
14. Ebrahim EM, Ghebrehiwot L, Abdalgfar T, Juni MH. Health care system in Sudan: review and analysis of strength, weakness, opportunity, and threats (SWOT analysis). Sudan journal of medical sciences. 2017;12(3):133-50.
15. Carnahan E, Gurley N, Asimwe G, Chilundo B, Duber HC, Faye A, et al. Lessons learned from implementing prospective, multicountry mixed-methods evaluations for Gavi and the Global Fund. Global Health: Science and Practice. 2020;8(4):771-82.
16. Nichols M. "An Epidemic of Coups", UN Chief Laments, Urging Security Council to Act. Reuters, October. 2021;26.
17. Osman M, Alassam MN. Military attacks on health workers in Sudan. Lancet. 2022;399.

- 794 18. Sudan Suspended from the African Union [Internet]. Sudan Suspended from the African Union.  
795 19. UN relief chief urges end to ‘humanitarian nightmare’ in Sudan [Internet]. .  
796 <https://news.un.org/en/story/2023/10/1142362>
- 797 20. Sudan is reeling after six months of war - Statement by Martin Griffiths, Under-Secretary-General for  
798 Humanitarian Affairs and Emergency Relief Coordinator [Internet].  
799 [https://www.unocha.org/publications/report/sudan/sudan-reeling-after-six-months-war-statement-martin-](https://www.unocha.org/publications/report/sudan/sudan-reeling-after-six-months-war-statement-martin-griffiths-under-secretary-general-humanitarian-affairs-and-emergency-relief-coordinator-enarOctober)  
800 [griffiths-under-secretary-general-humanitarian-affairs-and-emergency-relief-coordinator-enarOctober](https://www.unocha.org/publications/report/sudan/sudan-reeling-after-six-months-war-statement-martin-griffiths-under-secretary-general-humanitarian-affairs-and-emergency-relief-coordinator-enarOctober) 2023.
- 801 21. UNICEF and WHO warn that further attacks & disruptions of health and nutrition services in Sudan  
802 could cost over 10,000 young lives by the end of 2023 [Internet]. . [https://www.unicef.org/sudan/press-](https://www.unicef.org/sudan/press-releases/unicef-and-who-warn-further-attacks-disruptions-health-and-nutrition-services-sudan)  
803 [releases/unicef-and-who-warn-further-attacks-disruptions-health-and-nutrition-services-sudan](https://www.unicef.org/sudan/press-releases/unicef-and-who-warn-further-attacks-disruptions-health-and-nutrition-services-sudan).
- 804 22. More rape cases reported by Sudan social affairs unit [Internet].  
805 <https://www.dabangasudan.org/en/all-news/article/more-rapes-reported-by-sudan-social-affairs-unit>.
- 806 23. Dafallah A, Elmahi OK, Ibrahim ME, Elsheikh RE, Blanchet K. Destruction, disruption and disaster:  
807 Sudan’s health system amidst armed conflict. *Conflict and health*. 2023;17(1):43.
- 808 24. Thornton J. Attacks on health care continue in Sudan. *Lancet*. 2023;401(10391):1837-.
- 809 25. Alfadul ES, Alrawa SS. Fighting rages in Sudan—its people and their healthcare pay the price. *British*  
810 *Medical Journal Publishing Group*; 2023.
- 811 26. UNICEF. Children in Sudan. [https://www.unicef.org/sudan/children-](https://www.unicef.org/sudan/children-sudan#:~:text=Sudan%20has%20one%20of%20the%20highest%20rates%20of,of%20annual%20dry%20spells%20and%20rising%20food%20prices.2023)  
812 [sudan#:~:text=Sudan%20has%20one%20of%20the%20highest%20rates%20of,of%20annual%20dry%20spells](https://www.unicef.org/sudan/children-sudan#:~:text=Sudan%20has%20one%20of%20the%20highest%20rates%20of,of%20annual%20dry%20spells%20and%20rising%20food%20prices.2023)  
813 [%20and%20rising%20food%20prices.2023](https://www.unicef.org/sudan/children-sudan#:~:text=Sudan%20has%20one%20of%20the%20highest%20rates%20of,of%20annual%20dry%20spells%20and%20rising%20food%20prices.2023).
- 814 27. Palinkas L, Horwitz S, Green C, Wisdom J, Duan N, Hoagwood K. Purposeful Sampling for Qualitative  
815 Data Collection and Analysis in Mixed Method Implementation Research. *Administration and Policy in Mental*  
816 *Health and Mental Health Services Research*. 2015;42(5):533-44.
- 817 28. Mack N, Woodsong C, MacQueen KM, Guest G, Namey E. *Qualitative research methods: a data*  
818 *collectors field guide*. 2005.
- 819 29. Susan PS, Jesse BB, Ece AÖ, Joseph K, Michael RR. Political Economy Analysis for Health Financing  
820 Reform. *Health systems and reform*. 2019;5(3):183-94.
- 821 30. Braun V, Clarke V. Using thematic analysis in psychology. *Qualitative Research in Psychology*.  
822 2006;3(2):77-101.
- 823 31. Clarke V, Braun V. Teaching thematic analysis: Overcoming challenges and developing strategies for  
824 effective learning. *The psychologist*. 2013;26(2):120-3.
- 825 32. Vaismoradi M, Turunen H, Bondas T. Content analysis and thematic analysis: Implications for  
826 conducting a qualitative descriptive study. 2013. p. 398-405.

- 827 33. Mallender J, Bassett M, Mallender J. Health System Benefit Package Design & Provider  
828 Payment Mechanisms. 2020.
- 829 34. Mallender J, Bassett M, Mallender J. Provider Payment Mechanisms Technical Report. World Health  
830 Organization; 2020.
- 831 35. Chin JJ, Kirkpatrick J. African coups in the COVID-19 era: A current history. *Frontiers in Political  
832 Science*. 2023;5:1077945.
- 833 36. Storeng KT, Mishra A. Politics and practices of global health: Critical ethnographies of health  
834 systems. *Global public health*. 2014;9(8):858-64.
- 835 37. Organization WH, editor Rio political declaration on social determinants of health. World conference  
836 on social determinants of health; 2011: World Health Organization Rio de Janeiro.
- 837 38. Cashin C, Gatome-Munyua A. The strategic health purchasing progress tracking framework: a  
838 practical approach to describing, assessing, and improving strategic purchasing for universal health coverage.  
839 *Health Systems & Reform*. 2022;8(2):e2051794.
- 840 39. Ogundeji YK, Anyaegbu J, Fodio A, Egekwu C, Ohiri K, Mao W, et al. Lessons on Key Health Service  
841 Purchasing Reforms in Nigeria. 2023.
- 842 40. Kazungu JS, Barasa EW, Obadha M, Chuma J. What characteristics of provider payment mechanisms  
843 influence health care providers' behaviour? A literature review. *The International journal of health planning  
844 and management*. 2018;33(4):e892-e905.
- 845 41. Boachie MK. Healthcare provider-payment mechanisms: a review of literature. *J Behav Econ,  
846 Finance, Entrep, Account Transp*. 2014;2:41-6.
- 847 42. Al Rawda M, Elhussein DM, Habbani K, Kheir SG, Awad MM. The Impact of Out-of-Pocket  
848 Expenditures on Utilization of Health-Care Services in Sudan from 2010 to 2020: A Critical Review. 2023.
- 849 43. Habbani K, Groot W, Jelovac I. Do free-of-charge public health services impede cost recovery policies  
850 in Khartoum state, Sudan? *EMHJ-Eastern Mediterranean Health Journal*, 13 (4), 939-952, 2007. 2007.
- 851 44. Papanicolas I, Rajan D, Karanikolos M, Soucat A, Figueras J. Health system performance assessment:  
852 a framework for policy analysis: World Health Organization; 2022.
- 853 45. Mathauer I, Saksena P, Kutzin J. Pooling arrangements in health financing systems: a proposed  
854 classification. *International journal for equity in health*. 2019;18:1-11.
- 855 46. Organization WH. Increasing access to health workers in remote and rural areas through improved  
856 retention: global policy recommendations: World Health Organization; 2010.
- 857 47. Packard TG, Baeza CC. Beyond survival: protecting households from health shocks in Latin America:  
858 World Bank Publications; 2006.
- 859 48. Akerlof G. A., 1970, The market for 'lemons': Quality uncertainty and the market mechanism.  
860 *quarterly Journal of Economics*. 1970;84(3):488-500.

- 861 49. Elwasila SM. Health and economic growth in Sudan: Cointegration and Granger causality analysis  
862 (1969-2015). *Turkish Economic Review*. 2018;5(2):191.
- 863 50. Evans DB, Mataria A, Kurowski C, Schmidt M. Financing Revenue Raising, Health Pooling, Care and  
864 Purchasing. *Making Health Systems Work in Low and Middle Income Countries: Textbook for Public Health  
865 Practitioners*. 2022:67.
- 866 51. Salim AMA, Hamed FHM. Exploring health insurance services in Sudan from the perspectives of  
867 insurers. *SAGE open medicine*. 2018;6:2050312117752298.
- 868 52. Mohammed F. Assessing fiscal space for national health insurance funds in Sudan. *Maliye  
869 Arařtırmaları Dergisi*. 2016;2(3):19-27.
- 870 53. Setswe G, Witthuhn J. Community engagement in the introduction and implementation of the  
871 National Health Insurance in South Africa. *Journal of Public Health in Africa*. 2013;4(1).
- 872 54. Vassall A, Martínez-Álvarez M. The health system and external financing. *Health systems in low-and  
873 middle-income countries* New York, NY: Oxford University Press Inc. 2012:193-217.
- 874 55. Msuya J. Horizontal and vertical delivery of health services: what are the tradeoffs. Background  
875 paper for the World Development Report. 2004.
- 876 56. Bertone MP, Jowett M, Dale E, Witter S. Health financing in fragile and conflict-affected settings:  
877 What do we know, seven years on? *Social science & medicine*. 2019;232:209-19.
- 878 57. Buse K, Walt G. An unruly melange? Coordinating external resources to the health sector: a review.  
879 *Social science & medicine*. 1997;45(3):449-63.
- 880 58. World Bank. Macro Poverty Outlook for Sudan:April 2023 [Internet].  
881 [https://documents1.worldbank.org/curated/en/099602104132320298/pdf/IDU0f81220a60bca104f0408e220](https://documents1.worldbank.org/curated/en/099602104132320298/pdf/IDU0f81220a60bca104f0408e2200a4406d9569f.pdf)  
882 [0a4406d9569f.pdf](https://documents1.worldbank.org/curated/en/099602104132320298/pdf/IDU0f81220a60bca104f0408e2200a4406d9569f.pdf).
- 883 59. Fadul N, Hussein ME, Fadul AA. Re-opening Sudan: the Balance Between Maintaining Daily Living and  
884 Avoiding the Next Peak of COVID-19. *Current Tropical Medicine Reports*. 2021:1-7.
- 885 60. Pattanshetty S, Bhatt K, Inamdar A, Dsouza V, Chattu VK, Brand H. Health Diplomacy as a Tool to  
886 build resilient health systems in Conflict Settings—A Case of Sudan. 2023.

887

888  
889  
890  
891  
892  
893  
894  
895  
896  
897  
898  
899  
900  
901  
902  
903  
904  
905  
906  
907  
908  
909  
910  
911  
912  
913  
914  
915  
916

## ANNEX 1

### Interview Guide

**Q1: As you reflect on recent events, can you tell me more about the current health financing landscape? how financing policies are made and how the multitiered structure of the health system works?**

Probing questions:

- How are those decisions made at federal level?
- How do SMOH access funds? How is the proportion/share of each state determined?

**Q2: In the event of a major political crisis, we see the health sector be among the first to be severely affected, are there mechanisms in place to mitigate this?**

- Is this mechanism a standard policy/protocol employed by the FMOH? How are these decisions made?
- How does the aftermath of such events affect this decision-making process?
- How do you assess the effectiveness of such measure? How successful have they been in mitigating these effects?

**Q3: What has happened to health financing in Sudan since April 2023?**

- How has this impacted service delivery?
- How has this impacted equity?
- How has this impacted financial protection?
- How has this impacted quality?

**Q4: who are the major actors in the health financing space at the moment?**

- What are their interests
- What decision-making power/influence do they have?

**Q5: what could/should be done now to release needed funds?**

**Q6: in the longer term how could we safeguard funds?**

- How feasible is this option?
- Who are the relevant actors, and how does this align/misalign with their interests?
- What would need to be in place for it to be a feasible and sustainable solution to mitigate the impact of negative political events/crises?

917

Annex 2: COREQ checklist

| No. Item                                       | Guide questions/description                                                                                                                | Reported on Page |
|------------------------------------------------|--------------------------------------------------------------------------------------------------------------------------------------------|------------------|
| <b>Domain 1: Research team and reflexivity</b> |                                                                                                                                            |                  |
| <i>Personal Characteristics</i>                |                                                                                                                                            |                  |
| 1. Inter viewer/facilitator                    | Which author/s conducted the inter view or focus group?                                                                                    | 10               |
| 2. Credentials                                 | What were the researcher’s credentials? E.g. PhD, MD                                                                                       | Cover page       |
| 3. Occupation                                  | What was their occupation at the time of the study?                                                                                        | 8                |
| 4. Gender                                      | Was the researcher male or female?                                                                                                         | 8                |
| 5. Experience and training                     | What experience or training did the researcher have?                                                                                       | 8                |
| <i>Relationship with participants</i>          |                                                                                                                                            |                  |
| 6. Relationship established                    | Was a relationship established prior to study commencement?                                                                                | 8                |
| 7. Participant knowledge of the interviewer    | What did the participants know about the researcher? e.g. personal goals, reasons for doing the research                                   | 8                |
| 8. Interviewer characteristics                 | What characteristics were reported about the inter viewer/facilitator? e.g. Bias, assumptions, reasons and interests in the research topic | 8                |

918

|                                          |                                                                                                             |   |
|------------------------------------------|-------------------------------------------------------------------------------------------------------------|---|
| <b>Domain 2: study design</b>            |                                                                                                             |   |
| <i>Theoretical framework</i>             |                                                                                                             |   |
| 9. Methodological orientation and Theory | What methodological orientation was stated to underpin the study? e.g. grounded theory, discourse analysis, | 9 |

|                                  |                                                                                    |    |
|----------------------------------|------------------------------------------------------------------------------------|----|
|                                  | ethnography, phenomenology, content analysis                                       |    |
| <i>Participant selection</i>     |                                                                                    |    |
| 10. Sampling                     | How were participants selected? e.g. purposive, convenience, consecutive, snowball | 8  |
| 11. Method of approach           | How were participants approached? e.g. face-to-face, telephone, mail, email        | 8  |
| 12. Sample size                  | How many participants were in the study?                                           | 8  |
| 13. Non-participation            | How many people refused to participate or dropped out? Reasons?                    | 8  |
| <i>Setting</i>                   |                                                                                    |    |
| 14. Setting of data collection   | Where was the data collected? e.g. home, clinic, workplace                         | 8  |
| 15. Presence of non-participants | Was anyone else present besides the participants and researchers?                  | 8  |
| 16. Description of sample        | What are the important characteristics of the sample? e.g. demographic data, date  | 8  |
| <i>Data collection</i>           |                                                                                    |    |
| 17. Interview guide              | Were questions, prompts, guides provided by the authors? Was it pilot tested?      | 10 |
| 18. Repeat interviews            | Were repeat inter views carried out? If yes, how many?                             | 10 |
| 19. Audio/visual recording       | Did the research use audio or visual recording to collect the data?                | 8  |
| 20. Field notes                  | Were field notes made during and/or after the inter view or focus group?           | 8  |
| 21. Duration                     | What was the duration of the inter views or focus group?                           | 8  |
| 22. Data saturation              | Was data saturation discussed?                                                     | 8  |
| 23. Transcripts returned         | Were transcripts returned to participants for comment and/or correction?           | 8  |
| <b>Domain 3: analysis and</b>    |                                                                                    |    |



|                                    |                                                                                                                                 |                                                                              |
|------------------------------------|---------------------------------------------------------------------------------------------------------------------------------|------------------------------------------------------------------------------|
| <b>findings</b>                    |                                                                                                                                 |                                                                              |
| <i>Data analysis</i>               |                                                                                                                                 |                                                                              |
| 24. Number of data coders          | How many data coders coded the data?                                                                                            | 10                                                                           |
| 25. Description of the coding tree | Did authors provide a description of the coding tree?                                                                           | N/A                                                                          |
| 26. Derivation of themes           | Were themes identified in advance or derived from the data?                                                                     | 10                                                                           |
| 27. Software                       | What software, if applicable, was used to manage the data?                                                                      | 10                                                                           |
| 28. Participant checking           | Did participants provide feedback on the findings?                                                                              | 8                                                                            |
| <i>Reporting</i>                   |                                                                                                                                 |                                                                              |
| 29. Quotations presented           | Were participant quotations presented to illustrate the themes/findings? Was each quotation identified? e.g. participant number | 11-18<br>Unattributed quotes were presented in order to protect participants |
| 30. Data and findings consistent   | Was there consistency between the data presented and the findings?                                                              | 11-18                                                                        |
| 31. Clarity of major themes        | Were major themes clearly presented in the findings?                                                                            | 11-18                                                                        |
| 32. Clarity of minor themes        | Is there a description of diverse cases or discussion of minor themes?                                                          | 11-18                                                                        |

919

920

Sudan, All-cause, Total spending, 1995-2020

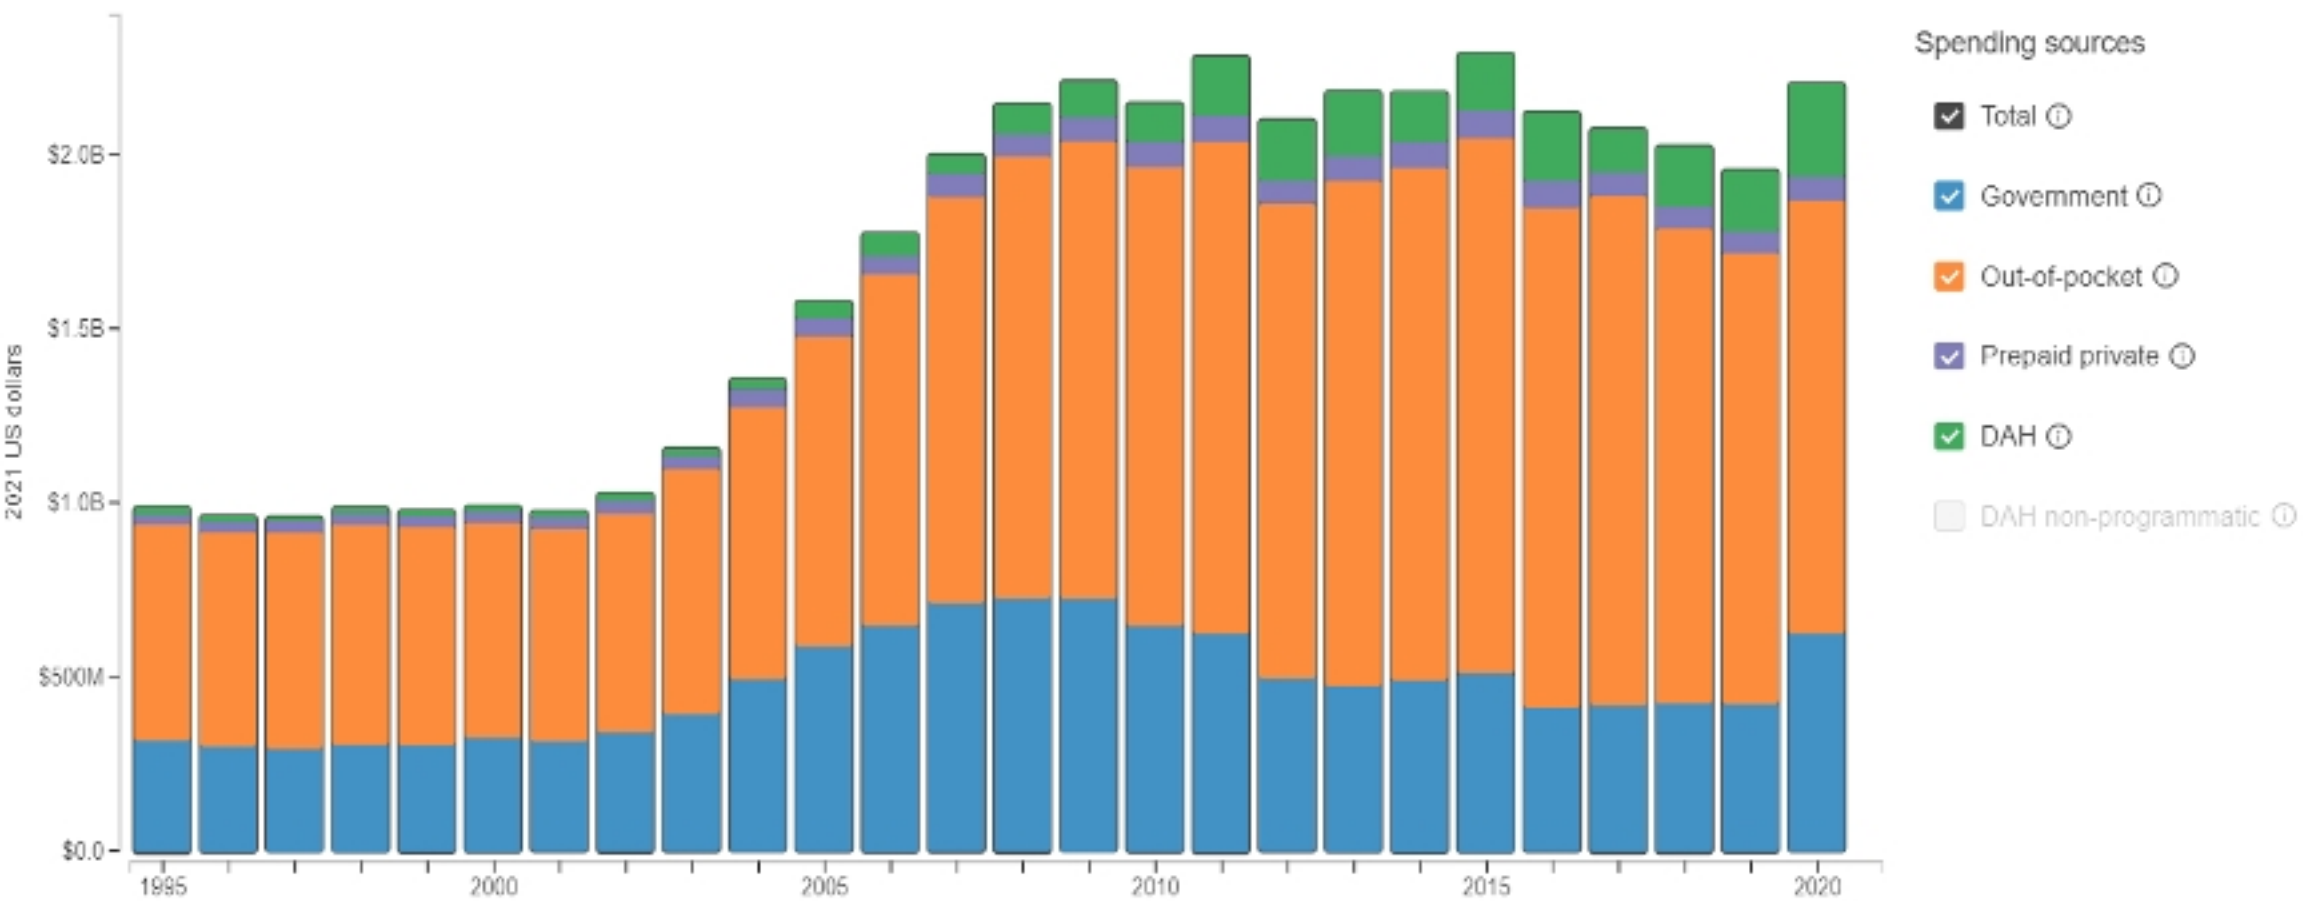

Figure 1

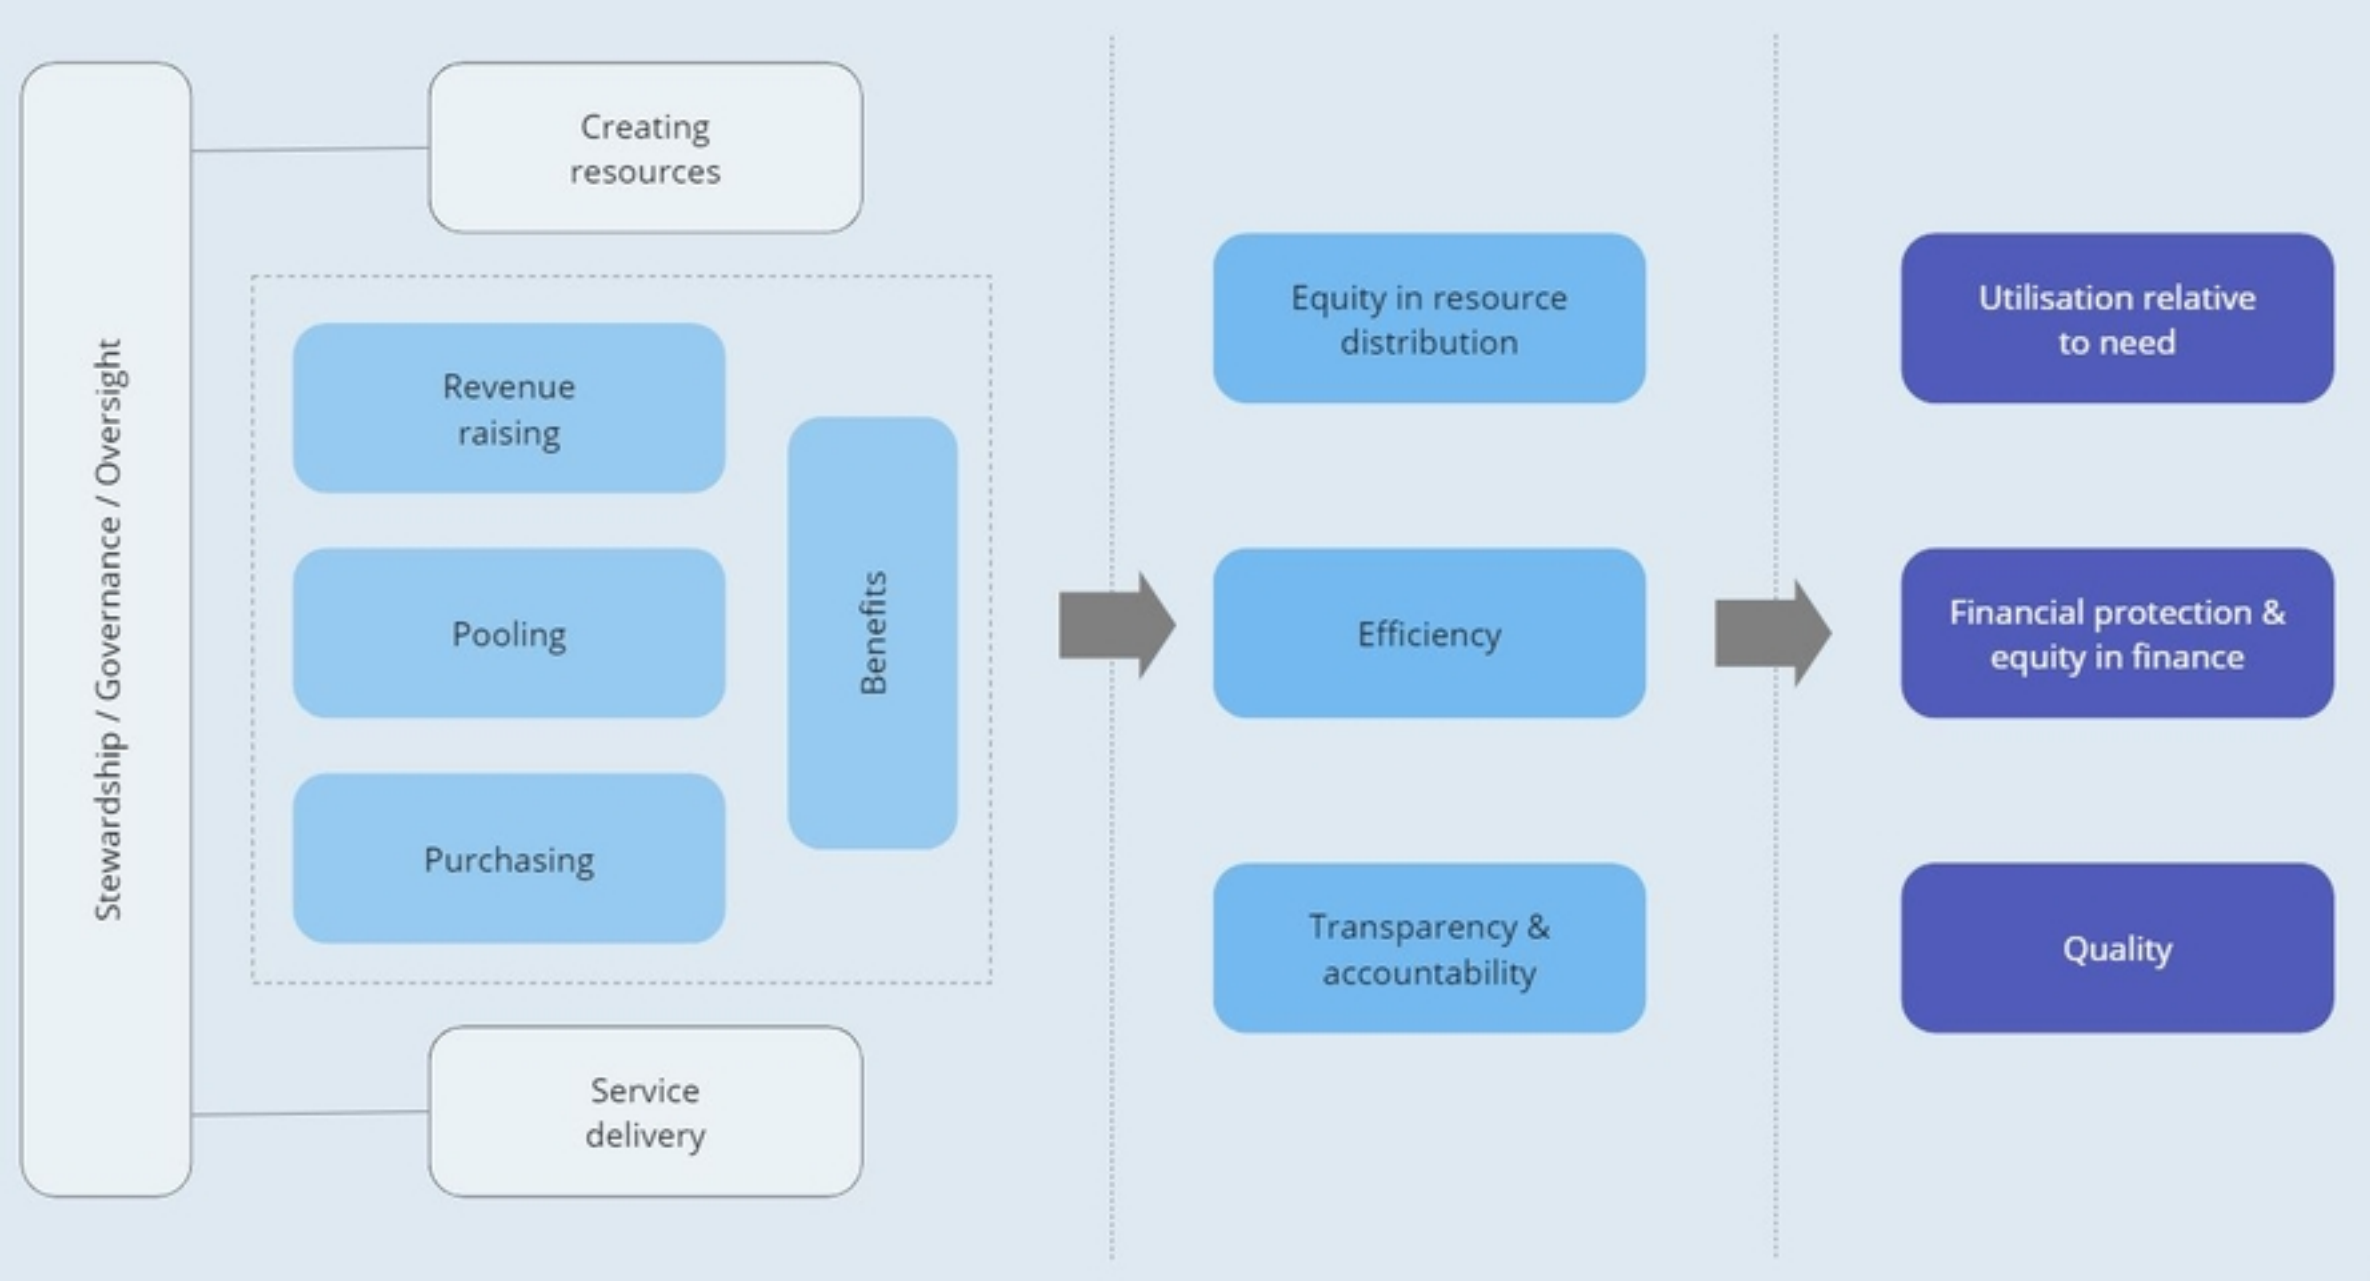

Figure 2
